# Supplementary material for: A Legume Genetic Framework Controls Infection of Nodules by Symbiotic and Endophytic Bacteria
Source: PLoS Genet. 2015 Jun 4;11(6):e1005280. doi: 10.1371/journal.pgen.1005280 (PMC4456278; doi:10.1371/journal.pgen.1005280)
Supplement: S2 Table — (DOCX) [file pgen.1005280.s009.docx]

**Supporting Table 2**

**A. Bacterial strains used in this study**

|  | | Strain | Antibiotic selection [μg/ml] | Reference | | --- | --- | --- | | *Herbaspirillum frisingense* GSF30 GFP | Kanamycin50 | Kindly provided by A. Hartmann | | *Herbaspirillum* B501 GFP | Kanamycin100 | Kindly provided by A. Hartmann | | *Rhizobium giardinii* 129E RFP | Streptomycin200Gentamycin15 | Kindly provided by M. Roth and  P. Schulze-Lefert | | *Burkholderia* KAW25 | Tetracyclin5 | Kindly provided by K. Minamisawa | | *Burkholderia* KAW25 GFP | Tetracyclin5 | This work | | *R. mesosinicum KAW12* | Phosphomycin50 | Kindly provided by K. Minamisawa | | *R. mesosinicum* KAW12 DsRED | Tetracyclin10, Phosphomycin50 | This work | | *R.mesosinicum* KAW12 GFP | Tetracyclin10, Phosphomycin50 | This work | | *R. mesosinicum KAW12 eps1* | Neomycin100 | This work | | *R. mesosinicum* KAW12 *eps1* DsRED | Tetracyclin10, Neomycin100 | This work | | *Azorhizobium caulinodans* ORS571-GFP | Carbamycin100, Gentamycin25 | Kindly provided by S. Goormachtig | | *Mesorhizobium loti* R7A GFP | Tetracyclin2 | Kindly provided by J. Sullivan | | *Mesorhizobium loti* MAFF 303099 DsRED | Phosphomycin100, Gentamycin10 | Maekawa et al, 2010 | | *Mesorhizobium loti* R7A *exoU* GFP | Tetracyclin2, Neomycin50 | Kelly et al, 2013 | | *Mesorhizobium loti* R7A *nodZ* GFP | Kanamycin20 | Rodpothong et al, 2009 | |
| --- | --- | --- | --- | --- | --- | --- | --- | --- | --- | --- | --- | --- | --- | --- | --- | --- | --- | --- | --- | --- | --- | --- | --- | --- | --- | --- | --- | --- | --- | --- | --- | --- | --- | --- | --- | --- | --- | --- | --- | --- | --- | --- | --- | --- | --- | --- | --- | --- | --- |

**B. Primers used for specific bacterial DNA amplification**

| Name | Primer sequence |
| --- | --- |
| *M.loti* *NodC* | 5’ TACTGTTGCCATCTGCTCTT 3’  5’ ACCGCTTGATCTTGCATCTT 3’ |
| *M.loti* *NifH* | 5’ ACGGCGCCTATGATAATGTC 3’  5’ ATTTGCTCGTCCGTCTTCAT 3’ |
| 16S rRNA | 5’ AGAGTTTGATCCTGGCTCAG 3’  5’ AAGGAGGTGATCCAGCC 3’ |
| DsRED | 5’ GGACGTCATCAAGGAGTTCA 3’  5’ AAGTTCATCACGCGCTCC 3’ |
| GFP | 5’ TTTTCACTGGAGTTGTCCCA 3’  5’ TGCTAGTTGAACGCTTCCAT 3’ |
